# Supplementary material
Source: publisher figshare collection journal article supplement (https://sage.figshare.com/ndownloader/files/23017733)
Supplement: Supplementary file 1 [file 23017733]

## Appendix

Table A1  
*Population and Sample Comparison Based on Nationality without the Students who resigned from the University*

| Nationalities | Total Students |        | Sample T1 |        | Sample T2 & T3 |        |
|---------------|----------------|--------|-----------|--------|----------------|--------|
|               | Male           | Female | Male      | Female | Male           | Female |
| Australia     | 4              | 3      | 4         | 1      | 4              | 1      |
| China         | 3              | 0      | 2         | 0      | 2              | 0      |
| India         | 13             | 7      | 7         | 6      | 5              | 6      |
| Iran          | 0              | 4      | 0         | 4      | 0              | 4      |
| Malaysia      | 0              | 1      | 0         | 1      | 0              | 1      |
| Mexico        | 0              | 1      | 0         | 1      | 0              | 1      |
| Nepal         | 4              | 3      | 4         | 2      | 4              | 2      |
| Nigeria       | 1              | 0      | 1         | 0      | 1              | 0      |
| Pakistan      | 2              | 1      | 2         | 0      | 2              | 0      |
| Peru          | 0              | 1      | 0         | 1      | 0              | 1      |
| Saudi Arabia  | 1              | 1      | 0         | 0      | 0              | 0      |
| Sri Lanka     | 2              | 0      | 2         | 0      | 2              | 0      |
| Vietnam       | 0              | 2      | 0         | 2      | 0              | 2      |
| Total         | 30             | 24     | 22        | 18     | 20             | 18     |

Table A2  
List of the Effects

| Name of the Effect                           | Graphical Representation                                                           |                                                                                   |                                                                                     | Interpretation                                                                                                            |
|----------------------------------------------|------------------------------------------------------------------------------------|-----------------------------------------------------------------------------------|-------------------------------------------------------------------------------------|---------------------------------------------------------------------------------------------------------------------------|
| Network-attribute interactions               |                                                                                    |                                                                                   |                                                                                     |                                                                                                                           |
| Same Covariate                               |   |  |   | The tendency for a tie to exist between two actors of the same value for a given (categorical) attribute                  |
| Similar Covariate                            |   |  |   | The tendency for a tie to exist between two actors of similar value of a given (continuous) attribute                     |
| Alter Covariate                              |   |  |   | The tendency for actors with higher value (of a given attribute) to attract nominations from others (popularity)          |
| Ego Covariate                                |   |  |   | The tendency for actors with higher value of a given attribute to send more nominations to others (activity)              |
| Absolute Difference Covariate                |   |  |   | The tendency for ties to exist between two actors with dissimilar values on a attribute (an inverse measure of homophily) |
| Network-only (structural) tendencies effects |                                                                                    |                                                                                   |                                                                                     |                                                                                                                           |
| Outdegree                                    |   |                                                                                   |   | The baseline tendency for an actor to nominate another actor                                                              |
| Reciprocity                                  |   |  |   | The tendency for an actor to nominate another actor and being nominated by that same actor                                |
| Transitive Triplets                          |  |  |  | The tendency for “friends of friends become friends”                                                                      |

Table A2(continued)

| Name of the Effect                                                    | Graphical Representation                                                          |   | Interpretation                                                                      |                                                                                                                                                                            |
|-----------------------------------------------------------------------|-----------------------------------------------------------------------------------|---|-------------------------------------------------------------------------------------|----------------------------------------------------------------------------------------------------------------------------------------------------------------------------|
| Transitive Reciprocated Triplets                                      | 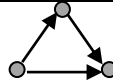 | → |  | The tendency for “friends of friends become friends”                                                                                                                       |
| OutTrunc                                                              |  | → |  | The tendency for the actors to have zero outdegree over time                                                                                                               |
| Indegree Popularity                                                   |  | → |  | The tendency for actors with higher indegree (popular) to become more popular over time                                                                                    |
| Outdegree Activity                                                    |  | → |   | The tendency for actors with higher outdegree to nominate more actors over time                                                                                            |
| Outdegree Popularity                                                  |  | → |  | The tendency for actors with higher outdegree to become more popular over time                                                                                             |
| Social influence effects (effects of networks on individual outcomes) |                                                                                   |   |                                                                                     |                                                                                                                                                                            |
| Average Alter                                                         |  | → |   | The tendency for actors whose alters have a higher average value of the behaviour, also have themselves a stronger tendency toward high value on the behaviour (contagion) |
| Individual-level effects on individual outcomes                       |                                                                                   |   |                                                                                     |                                                                                                                                                                            |
| Effect From                                                           |  |   | Influence of the actor variable on the changes in the behaviour                     |                                                                                                                                                                            |
